# Supplementary material for: Mogroside V alleviates inflammation response by modulating miR-21-5P/SPRY1 axis
Source: Royal Society of Chemistry journal article supplement (doi:10.1039/d3fo01901b), 2024-01-01

Fig2-E:

$\beta$ -actin

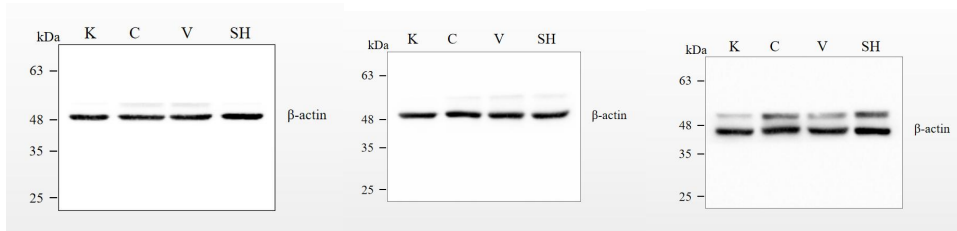

COX-2

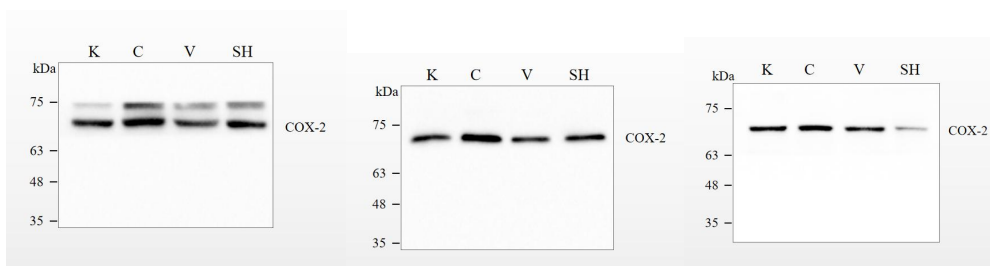

iNOS

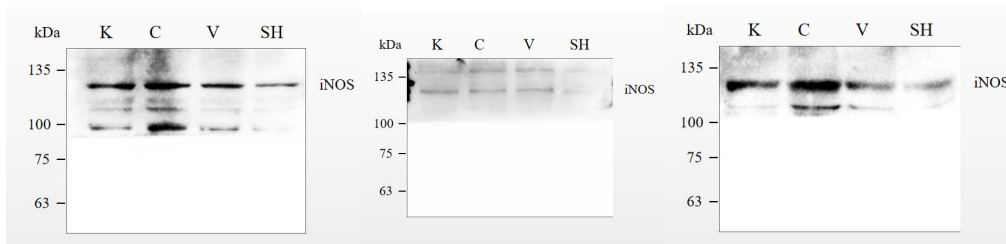

P65

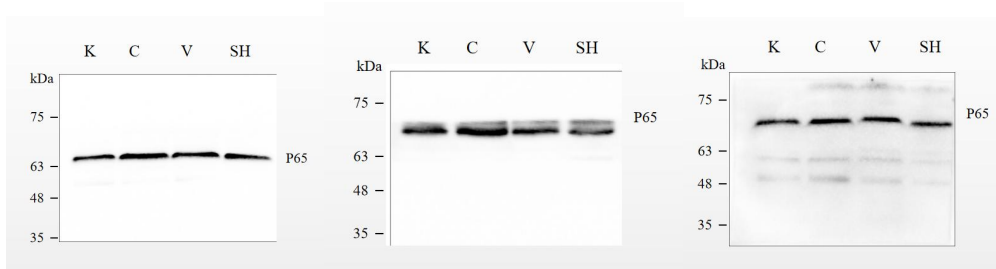

p-P65

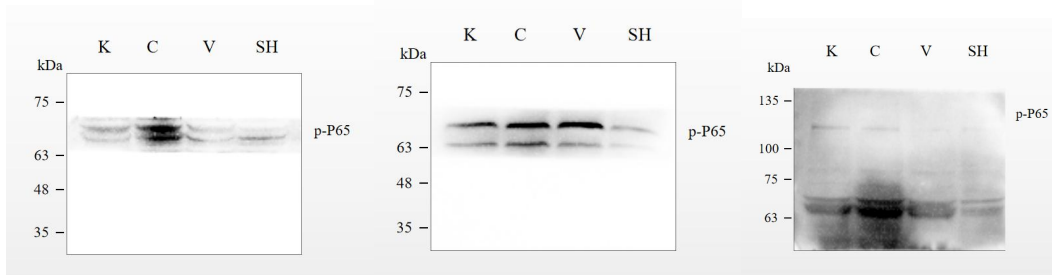

# Fig6-A:

## $\beta$ -actin

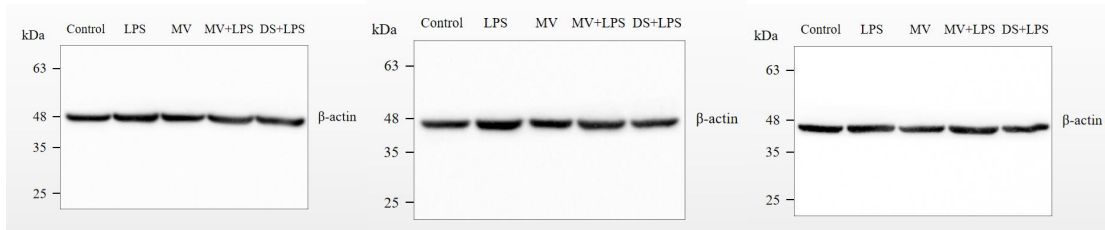

## SPRY1

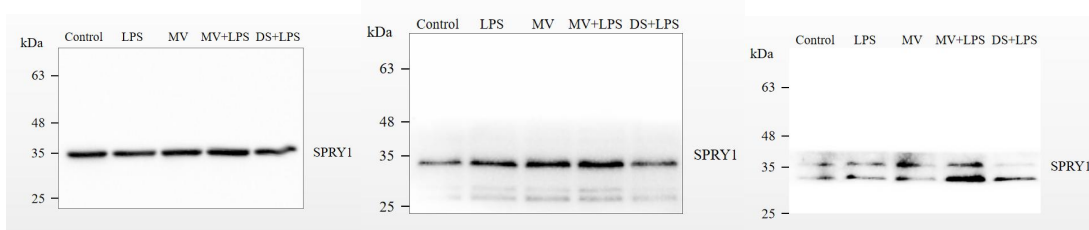

## P65

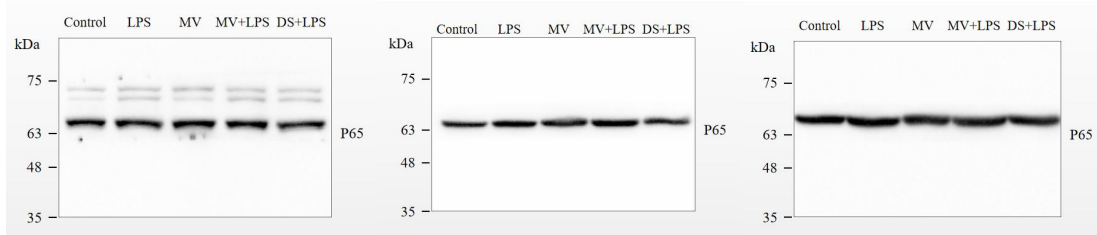

## p-P65

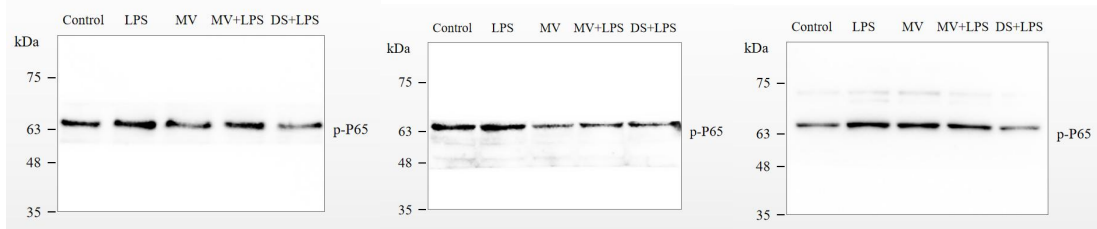

## COX-2

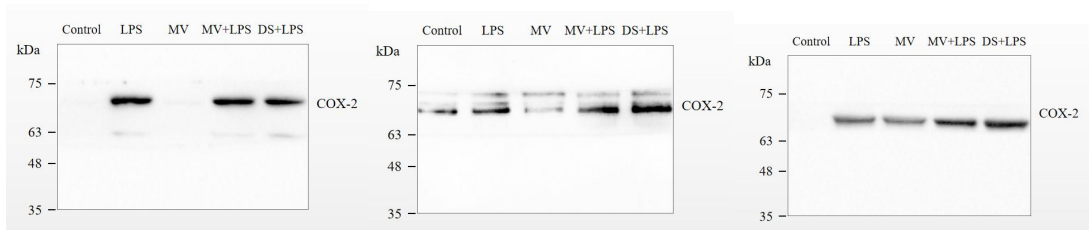

## iNOS

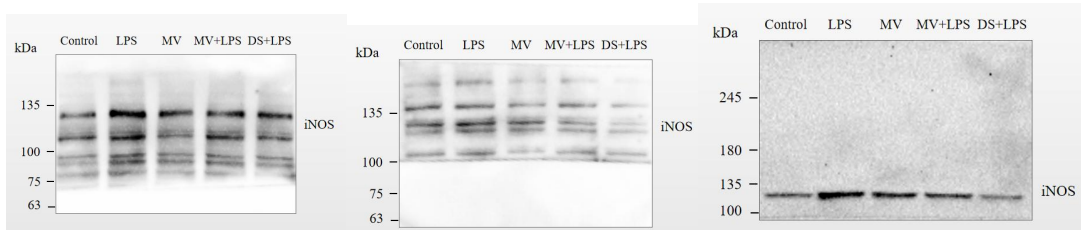

Fig6-F:

$\beta$ -actin

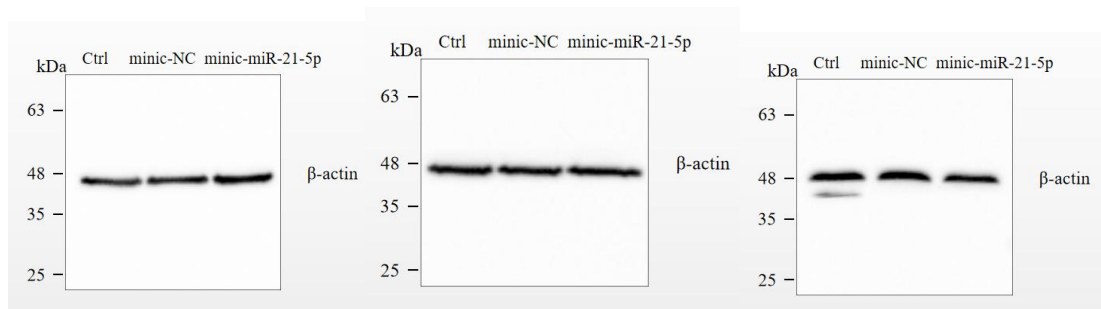

SPRY1

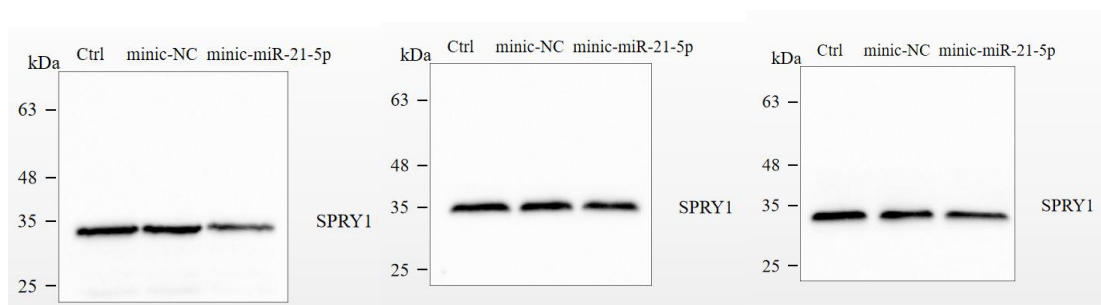

Fig6-G:

$\beta$ -actin

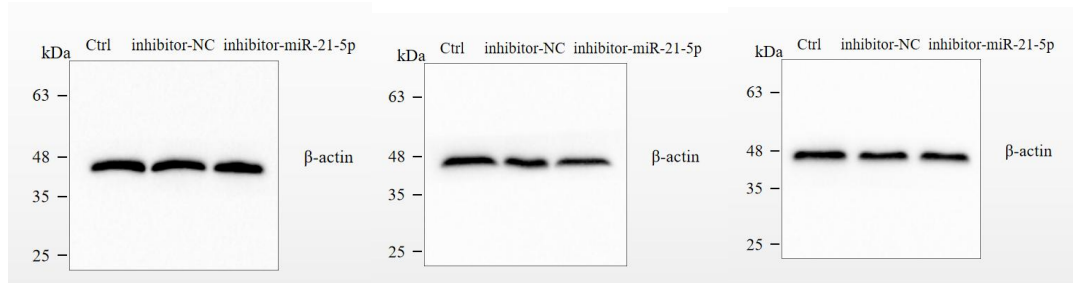

SPRY1

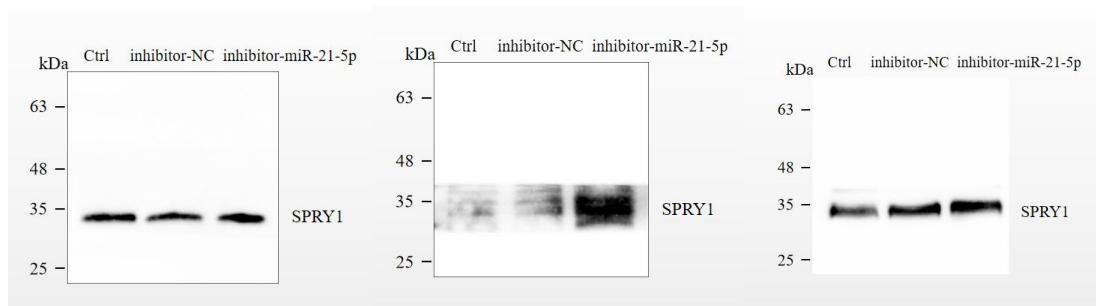

Fig7-A:

$\beta$ -actin

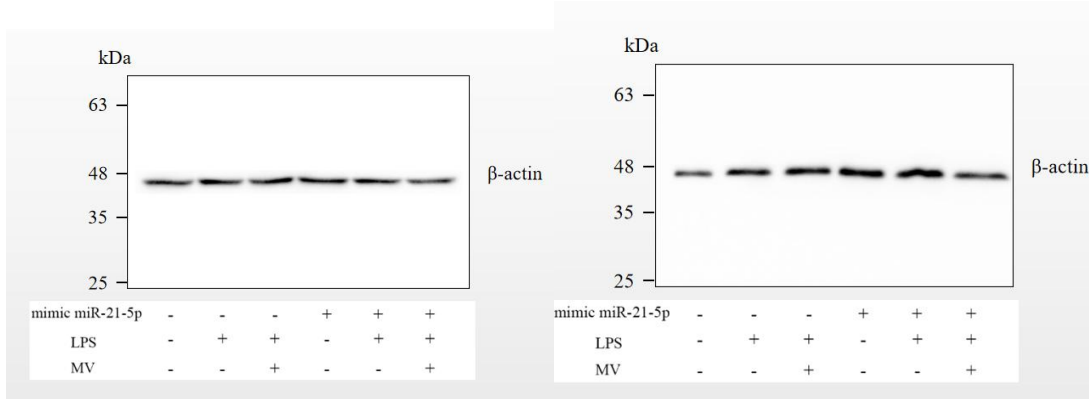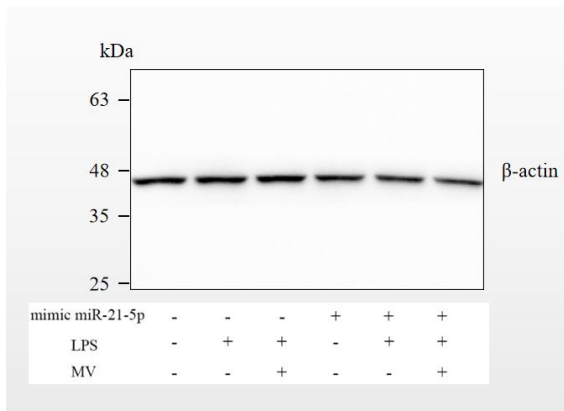

COX-2

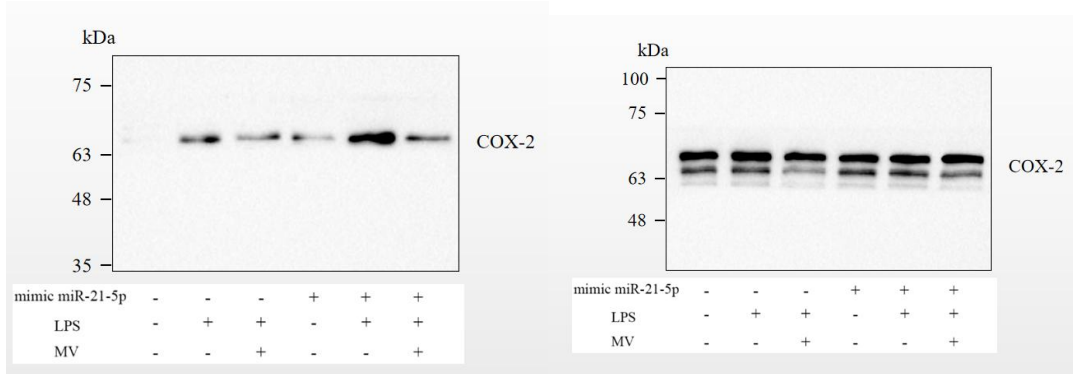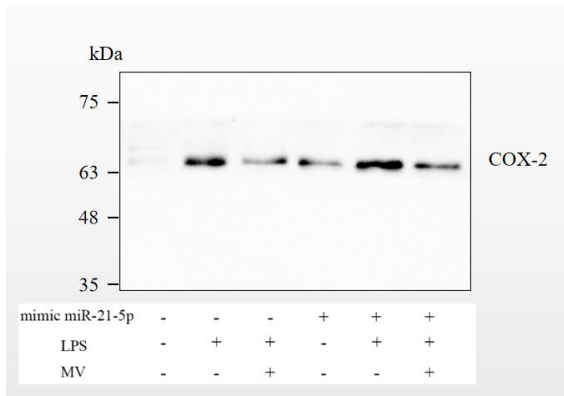

## iNOS

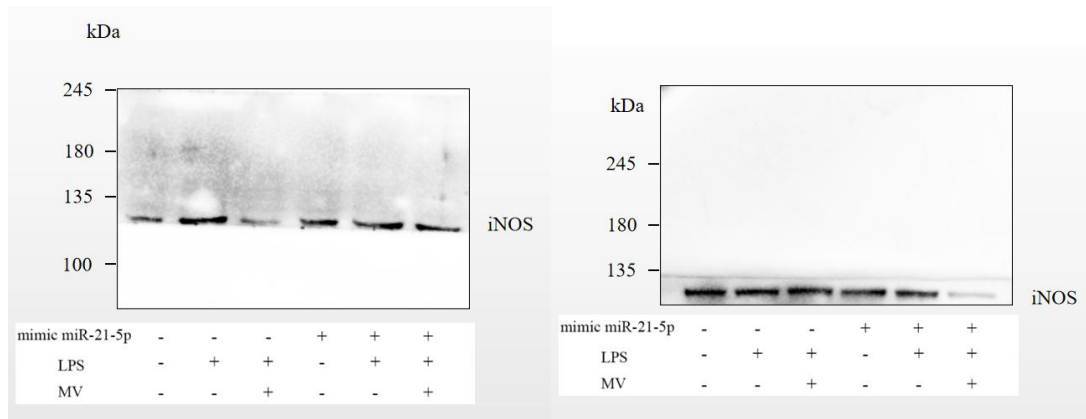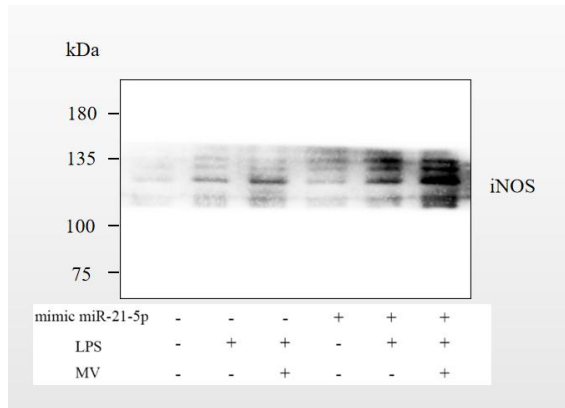

## SPRY1

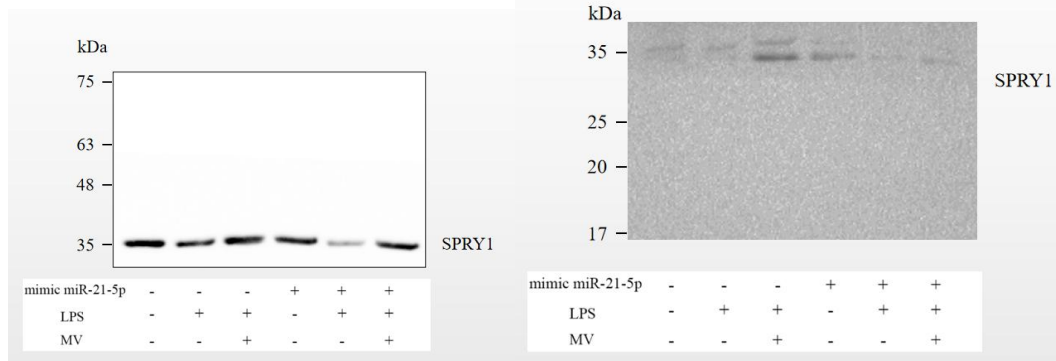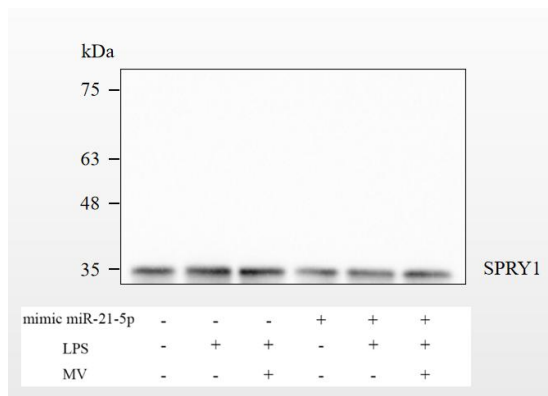

# Fig7-B:

β-actin

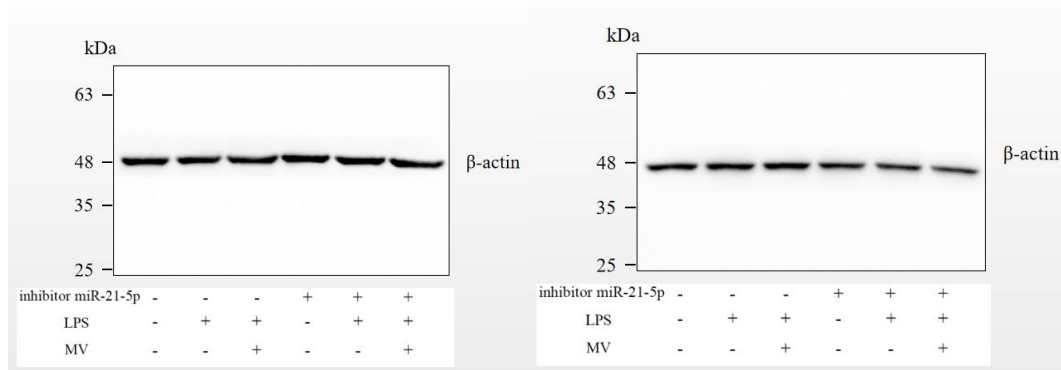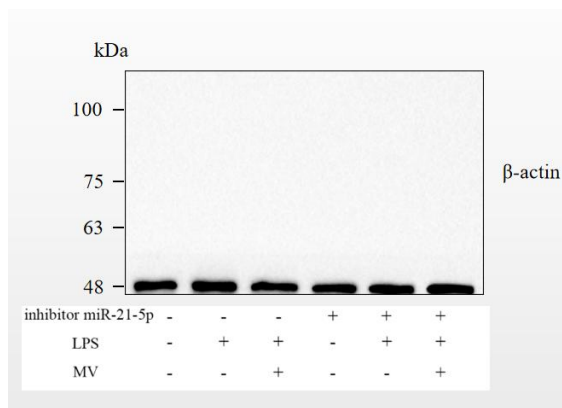

COX-2

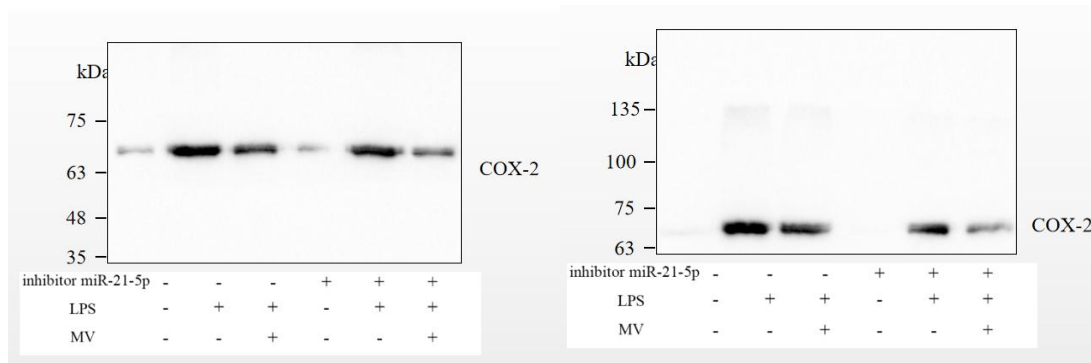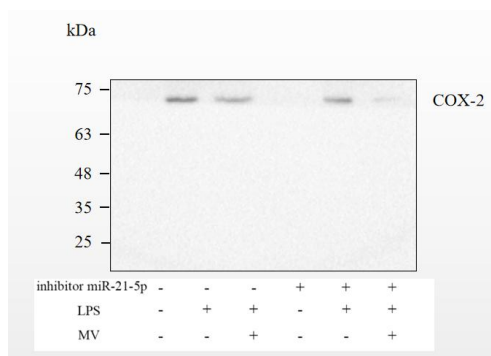

## iNOS

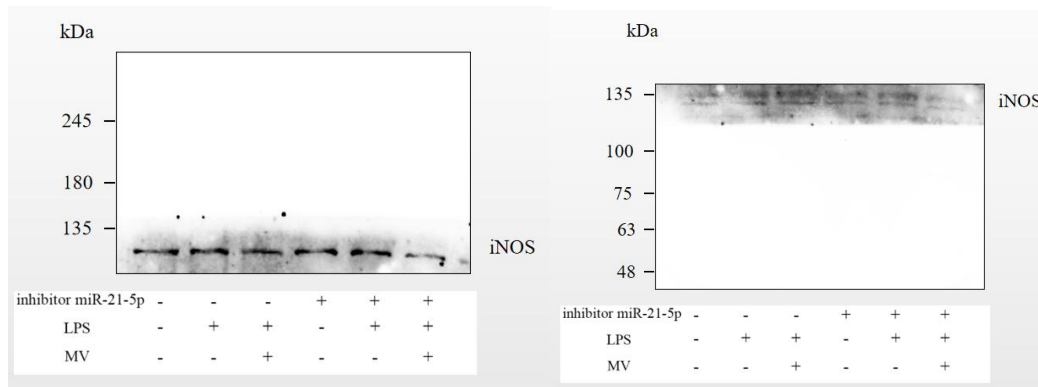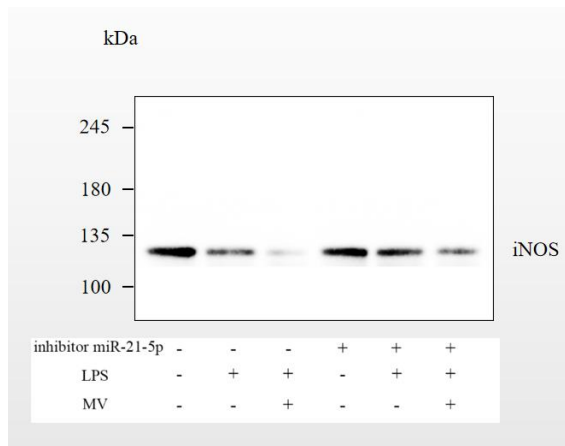

## SPRY1

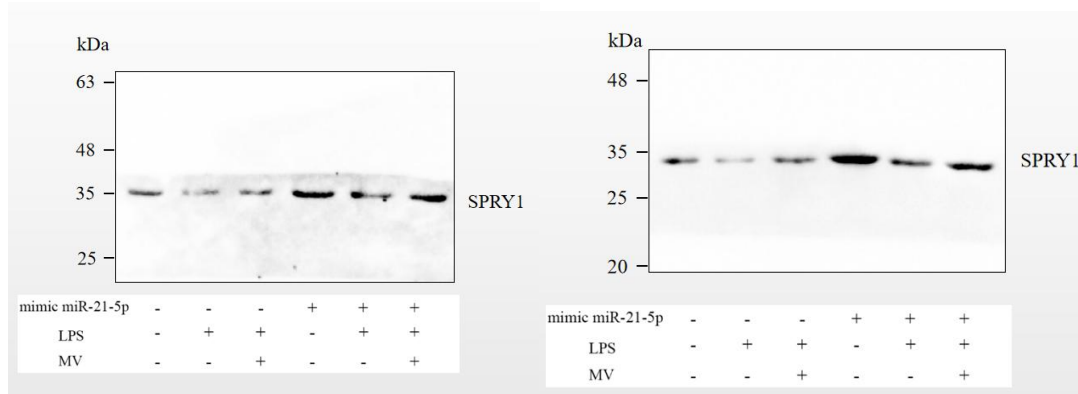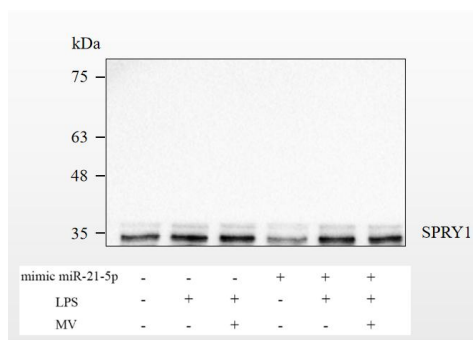

Fig8-A:

$\beta$ -actin

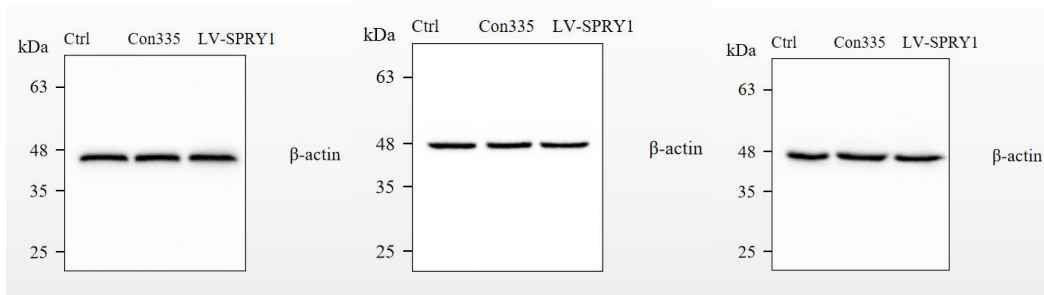

SPRY1

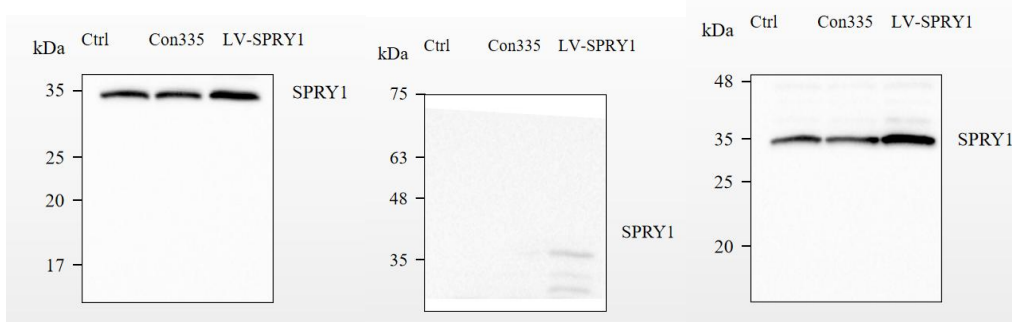

Fig8-B:

$\beta$ -actin

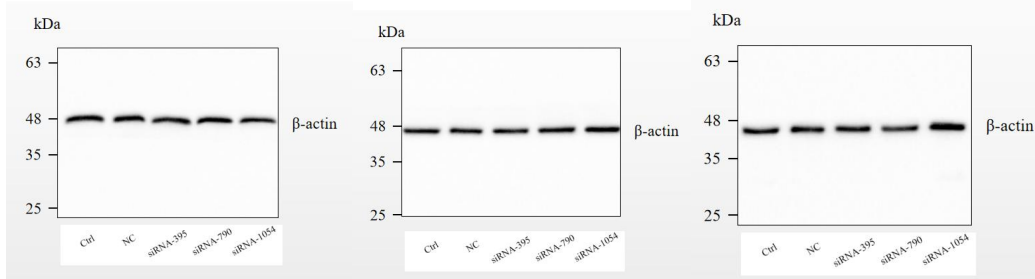

SPRY1

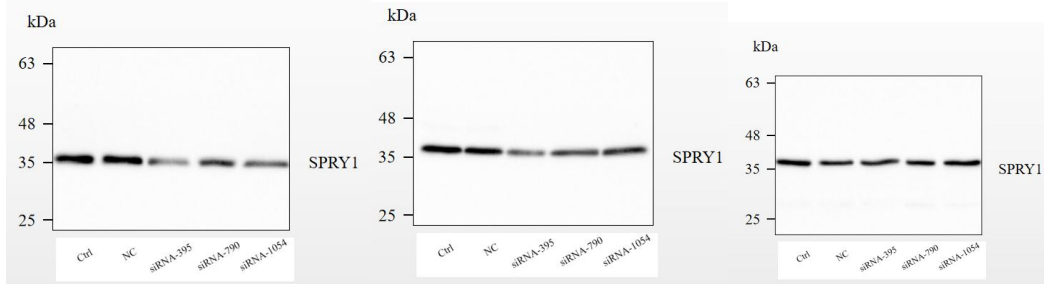



# Fig8-C:

$\beta$ -actin

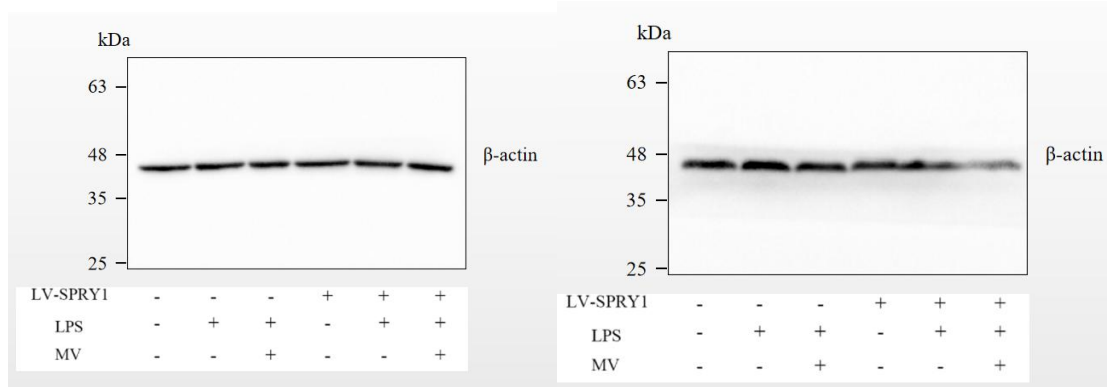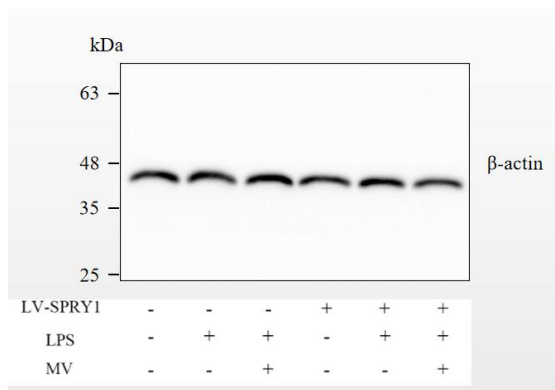

COX-2

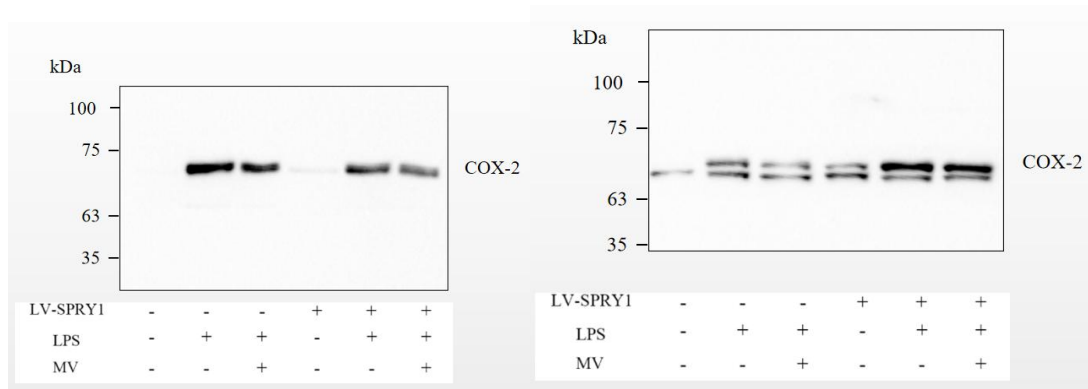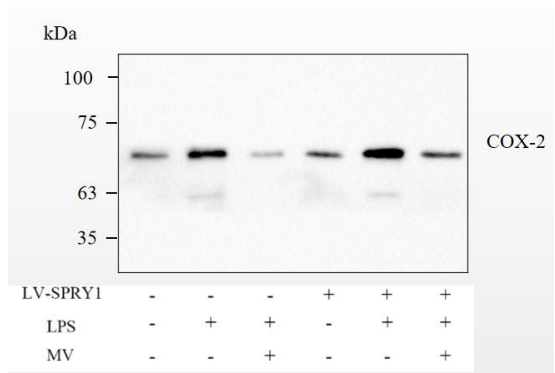

## iNOS

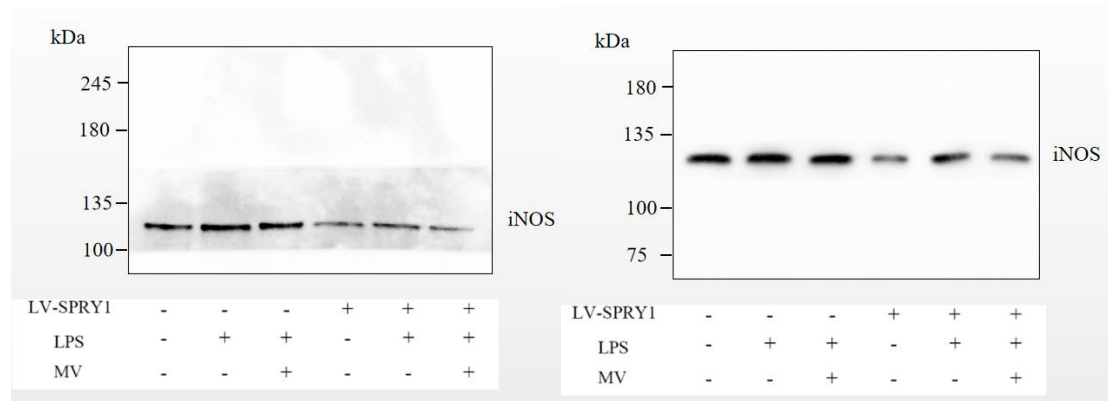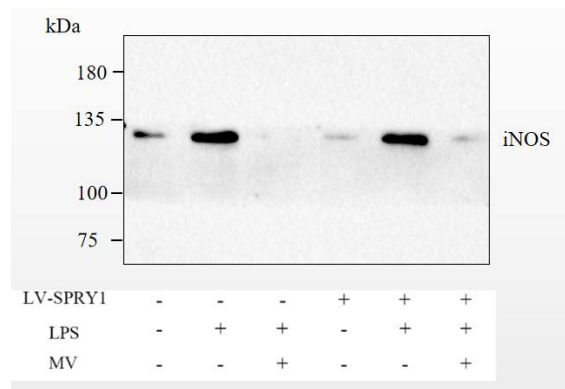

## SPRY1

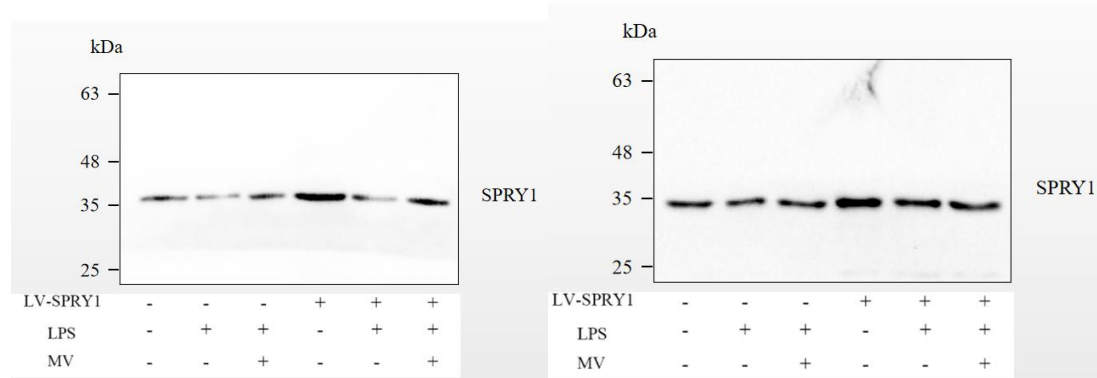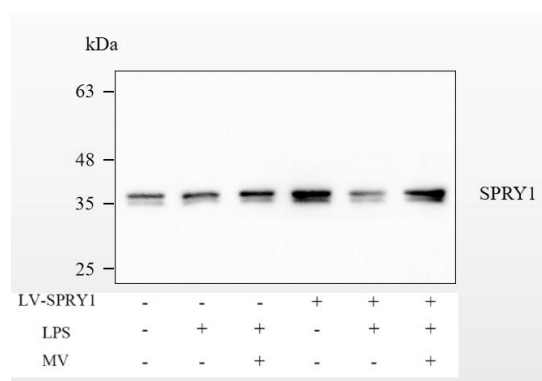

Fig8-D:

$\beta$ -actin

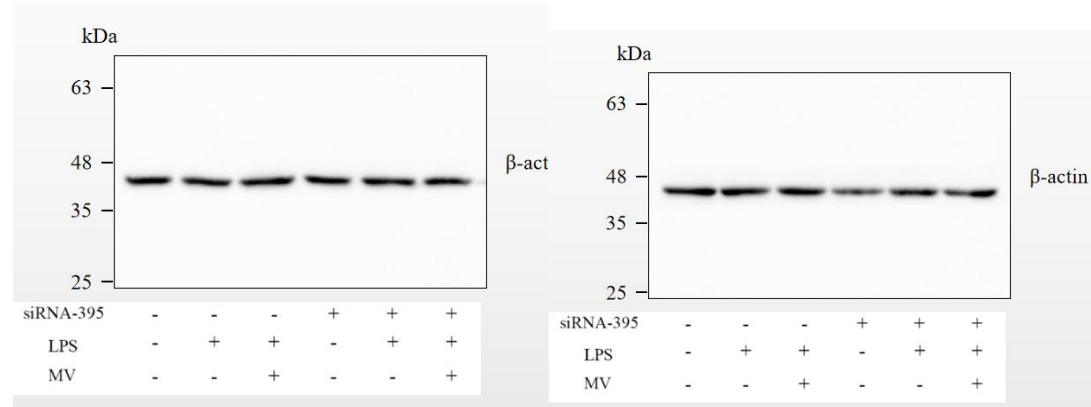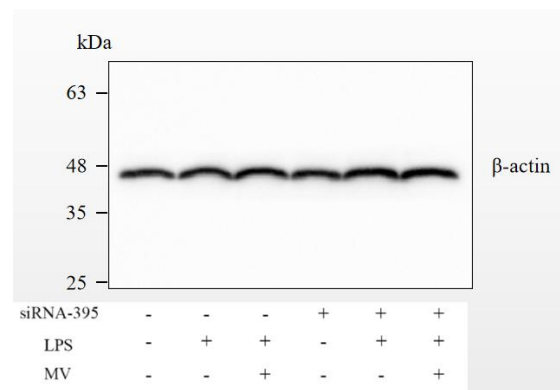

COX-2

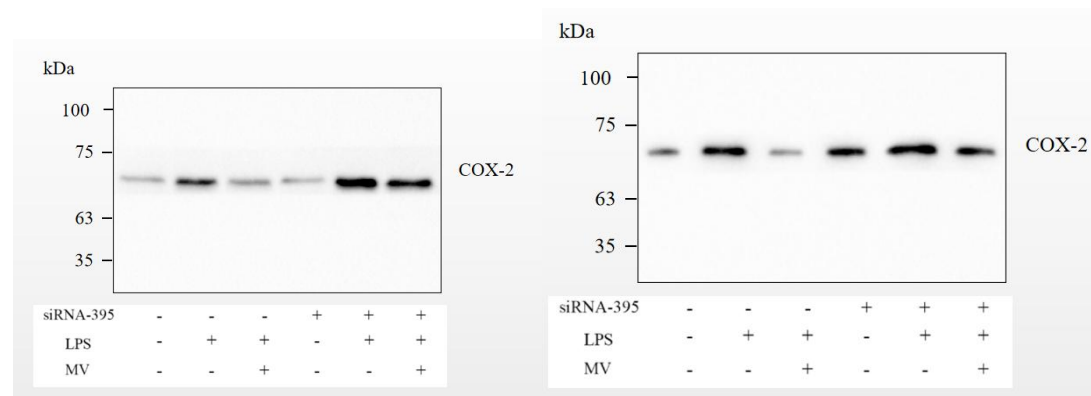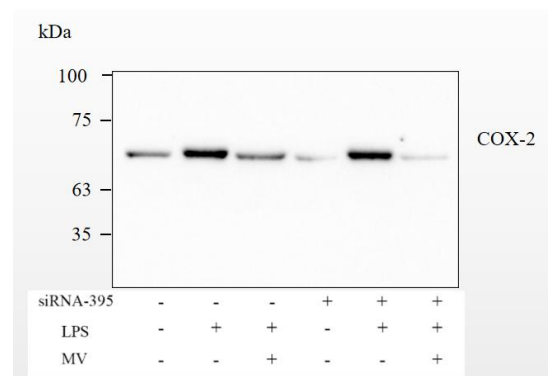

## iNOS

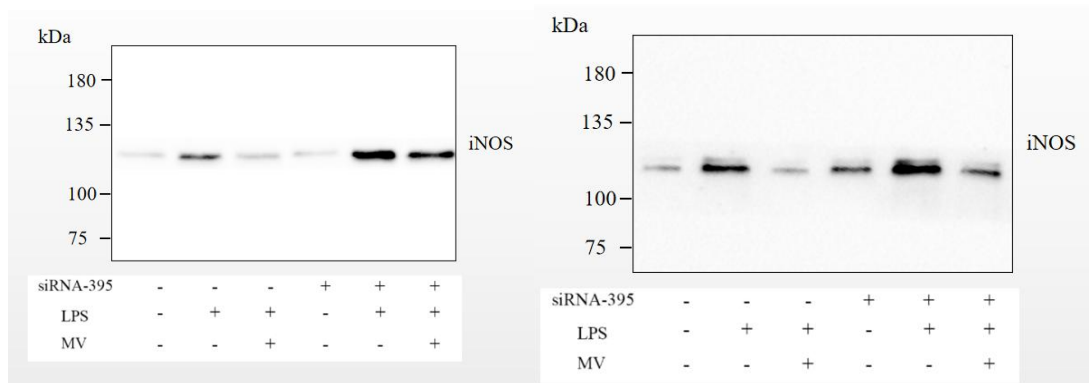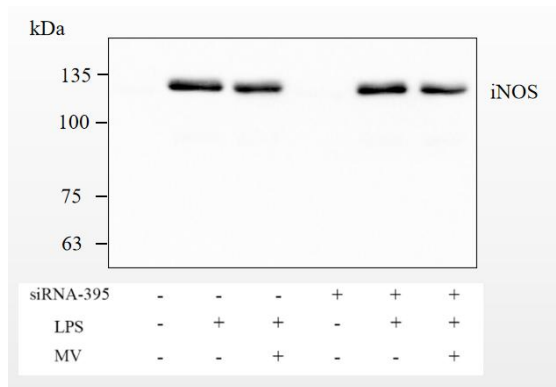

## SPRY1

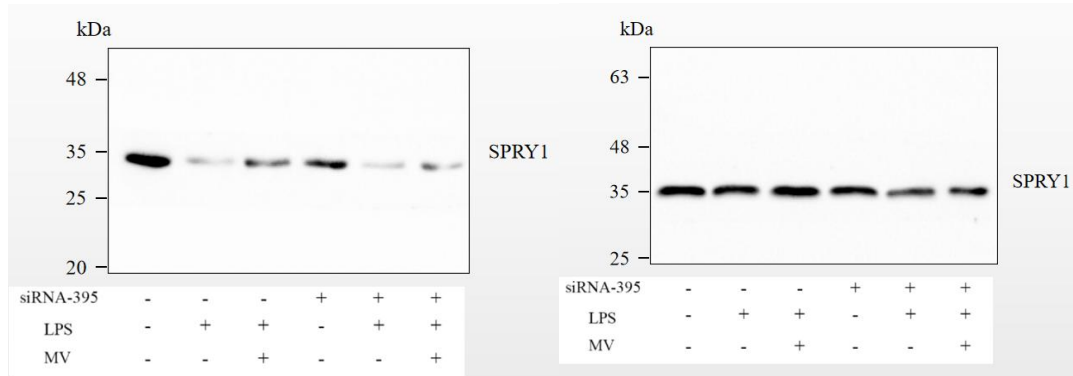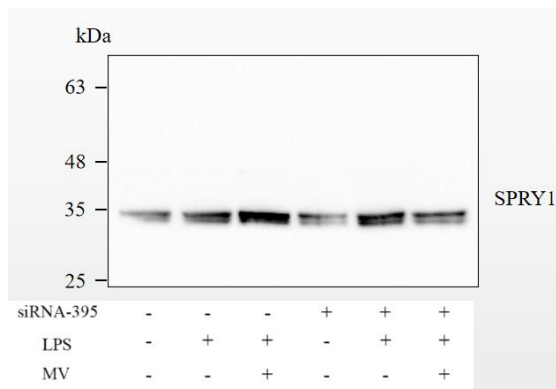

# Fig8-E:

$\beta$ -actin

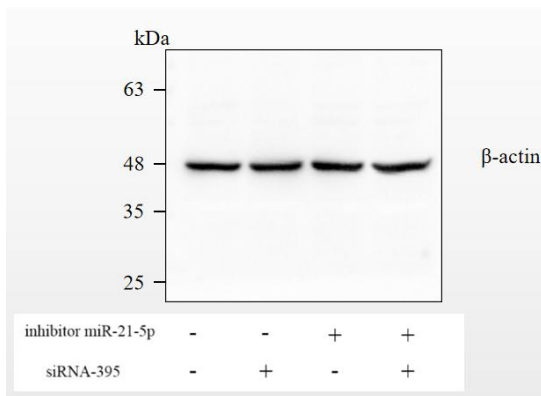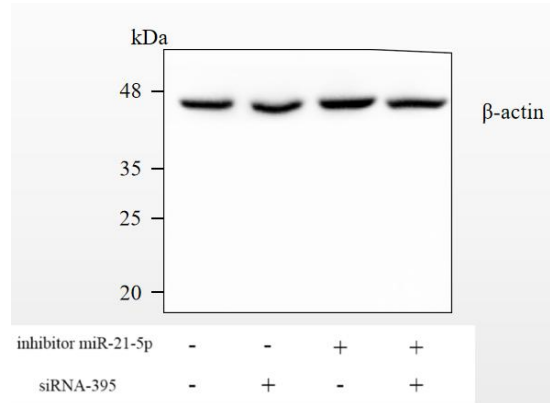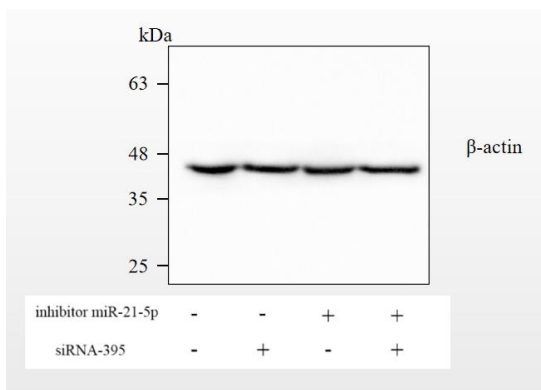

SPRY1

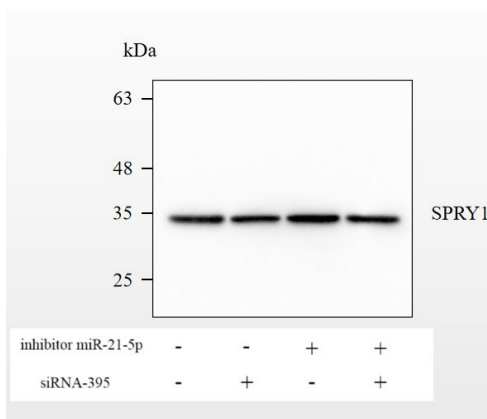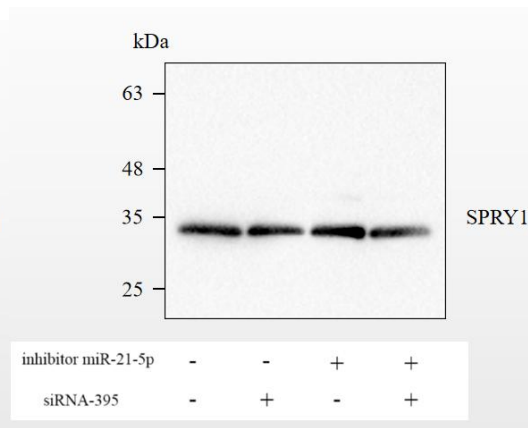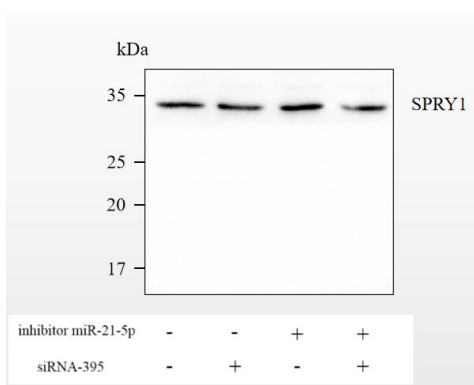

Fig8-F:

$\beta$ -actin

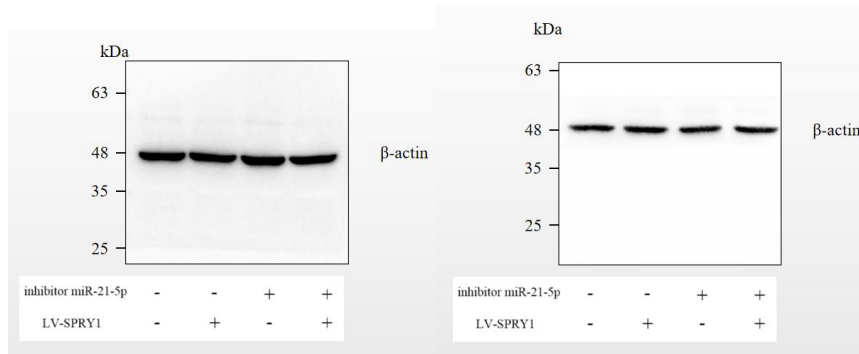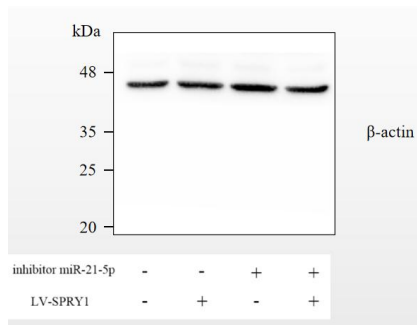

SPRY1

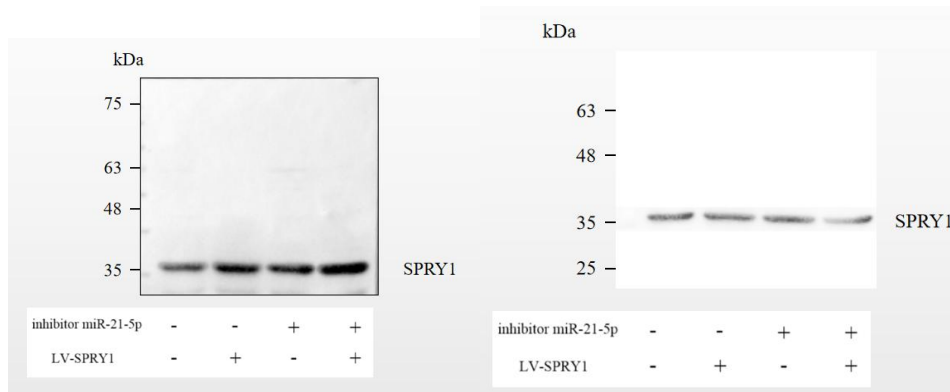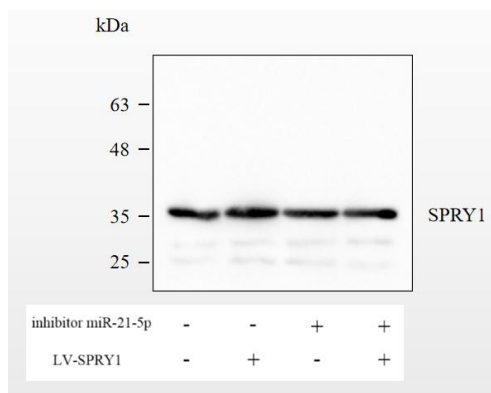

Supplement: d3fo01901b1.pdf [file d3fo01901b1.pdf]
